# Supplementary material for: A knowledge graph based question answering method for medical domain
Source: PeerJ journal article supplement (doi:10.7717/peerj-cs.667), 2021-09-01
Supplement: Data(translation).zip [file Data%28translation%29.zip]

## Sheet: Sheet1
Dark red bloody stool
Carcinomatous ascites
Belching acid
Belch
Ashner phenomenon
Positive for the Aung white sign
Positive for an-tor sign
Positive for Abadi sign
Addison
Edelman's big toe phenomenon
Positive for the anjilisku sign
Saddle nose
Arro pupil
Amino acid urine
Tranquility
Belching
Gastrointestinal symptoms in the late stage of cancer
Carcinomatous ureteral stenosis
Cancer fever
Retrograde spread of cancer cells
aspirin sensitivity
Esborg syndrome
There is a smell of rotten eggs when belching
Plug
Asperger syndrome
Scar of depression
Concave scar
Knock deafness
atopic cough
Pathological nystagmus
constipation
Constipation with dry mouth odor
Constipation can not be found
Constipation and difficult knot with abdominal pain
It is dry like sheep shit and dizziness
Hematochezia
Drop blood after defecation
Blood in the middle of the urinal
Blood stained with toilet paper
Blood
Tarpauline stool
Incontinence
Incomplete incontinence
Wave heat
Irregular heat
encapsulated effusion
atypical chest pain
Sleepiness during the day and insomnia at night
Restless legs syndrome
Excessive daytime sleep
Chapped papilla during lactation
Pathological papilla
Irregular breast hyperplasia
Partial papillary invagination
Neck pain
Can't turn neck
No sweat in the cold
Bladder blood storage head sweat
Flat chest
Incomplete incontinence
Pain and shoulder holding
Arm pain
Gait instability
Back Pain
Cold back
Back heat
Surface deficiency rheumatism waist weight
Hot asthma in the surface cold
Hold your breath
Bladder damp heat small abdominal pain
The puffer gas
Loose stool, bowel, sound, thirst, thirst, no drink
Loose stool with abdominal burnout
Loose stool with abdominal falling
Loose stools with cold legs cold
Wet and hot bladder urination yellow red
Frequency of wet and hot bladder urine
Residual urine after wet and hot urine of bladder
Incontinence of bladder heat storage and urination
Wet and hot bladder blood urine
Ejaculation
Exposed skin cord like knot
Red spots like makeup in butterfly shape
Leukoplakia
nasal congestion
Nose runny
Itchy nose
Nasal acid
Dry nose
Epistaxis
Rhinodynia
Nasal swelling
Regenerating phlegm nucleus
Endophytic meat
White eyes red and red
White eyes and chancroid
White eye fish cell
White eyes bleeding
Red wheel
Critical blindness
cataract
Defecal blood
White grease foam.
Constipation halitosis
amenorrhoea
Amenorrhea and overflow syndrome
Metrorrhagia
Avalanche
Abnormal leucorrhea
Liquefying of the vitreous body
The first thing to break
The clothes are not under
Infertility
pertussis
Hyperhidrosis in children with deficiency and non fixation
Dystrophy after illness
Frequency of urine in children with bladder damp and heat
Abnormal muscle strength of soleus
Muscle strength of latissimus dorsi
Hemispheric banded movement
Patella clonus
Blood from the object is infused with pupil
pathologic jaundice
Runny stool
Lamellar abdomen
Incomplete urinary retention *
Superficial esophageal cancer
Blood stasis in the palace of the uterus
Abdominal pain in blood stasis of the uterus
hemiplegia
Numbness in half
Herpes albicans
White herpes fever chest tightness
White herpes, weak thirst
Delirium on virus
Cold, hot and irritable
Sleepless
Porphyrin urine
Keloid
Cystospasm
White bean dregs like white belt
Pathological REM sleep
Bladder swelling
Soft papule of nose and cheek
BABINSKY test positive
Positive nose finger nose test
Don't - mon reflex
Can't pronounce
Bartlett sign positive
Positive for beher sign
Dysdifferentiation
Brence sign positive
Positive for belnaski sign
Positive for Berger sign
Bayar's sign positive
Blagal sign abnormality
Positive for Bev sign
Positive Ba Bu sign
Bactelau positive
Bilsovsky sign positive
Positive for biksin
Brookings' sign
Pathological fracture
The belvedev March
Barre sign
limp
Anaemia
Nasal sensations
Pigmentation of skin at exposed area
Bladder irritation
Bilateral peeling of the nasal wing
Tuberculosis of bladder
Bladder vaginal fistula
Bladder fibrosis
Decrease of bladder volume
Bladder swelling
Bladder emptying incomplete
Bladder dysfunction
Bladder residual urine increased
White visual field defect
Pain in the area
Gait abnormality
Unreal feeling
Discordant excitement
Anovulation
Can't blink
Can't bend your knees
Fever of unknown origin
Poor sleep hygiene
Poor building syndrome
An irresistible drink
Blinking
Atypical hyperplasia
fly-catcher tongue
Pulsatile headache
pulsatile tinnitus
Morbid pleasure
Pathological review
Pathological alopecia
Pathological nerve injury
Pathological calcification
Pathological laugh and cry
Pathological Q wave
Viral diarrhea
Ballance sign
White coat hypertension
Finger pressure pain around patella
Pain under patella
Anterior patellar emptiness
Postpatellar pain
Articulation of retropatella twist
Patella pain
Chondromalacia patellae
Patella missing or dysplasia
Patella strain
Patella osteoschism
The expression is indifferent
Dull expression
Necrosis of the whole epidermis and bullae under epidermis
Calcification of epidermis
Blood is free and mixed with feces
Long pox of nose
Nasal column defect
White nose hair
Exposure of nostrils
Stolen or suspected delusion
Passive position
Fetish
Trigger finger bounce
Excretion through vagina when stool is diluted
Constipation with severe abdominal pain
Constipation with abdominal mass
Small or absent tonsil
There is a gray membrane on the tonsil
Hyperemia and hypertrophy of tonsil
Tonsil congestion
Tonsil smaller and tough
Flatfoot
Flat face
Common castor skin debris in the middle of the plant
Brachial plexus involvement
Amenorrhea
Standing with closed eyes
It is difficult to stand by the eyes closed
Amenorrhea lactooverflow infertility triple syndrome
Pyrrolidine and guadiuria
Nose pale
Nose yellow or brown
Red blood of nose
Nose blackened
Babinski sign positive
Middle nasal septum bent to one side or two
Exposure of cartilage in septum or nasal cavity
Perforation of nasal septum
Swelling of nasal mucosa
Ulceration and atrophy of nasal mucosa
Ulceration of nasal mucosa
Dry and itchy nasal mucosa
Pale edema of nasal mucosa
Defect of upper alar
Thick nose
Defect of the margin of the nasal wing
Rhinorrhea
Foreign body of nasopharynx
Nasopharynx stenosis
Distant metastasis of NPC
Swelling and swelling of the external nose
There is a lot of shit in the nose
Nasal congestion and discharge purulent or bloody secretions
Nasal congestion and reflex headache
Bleeding in the middle and rear of the nasal cavity
Bleeding in the front of the nasal cavity
Dry nasal cavity and scab
Red and swollen skin of nasal vestibule
Nasal vestibular cyst
Itching of the vestibular part of the nose
Hypoplasia of paranasal sinus
Nose pus has bad smell
Granular and fragile scab in nasal mucosa
Atrophy of nasal mucosa and turbinate
Intranasal pain
There seems to be a runny nose in the nose
Nasopharyl detachment
Cleft nose
Obstruction of nasolacrimal duct
Pyorrhea of nostril
Dry nostril pain
To lean forward or to the sky
Nostril atresia
The nose tip is saddle shaped
Herpes zoster on tip or wing of nose
Swelling of turbinate
Atrophia of turbinate
Burning sensation of nose and throat
Edema of the nose root
Increased nasal secretion
Nose end is not in good shape
Nose end defect
Diffuse tidal red at the nose
Hypertrophy of nose
A fire is coming out of the nose
Sinus tenderness
Barotrauma of sinuses
Nasolabial groove deepening
Red chapped nose and lip groove
Nasolabial groove becomes shallow
Ulcer after scar damage
Tuberculosis of nose
Detrusor reflex free
Detrusor hyperreflexes
Detrusor instability
Phenylalanine metabolic disorder
Achalasia of cardia
Galloping horse law
Forced position
Delusion of victimization
backache
Back pain
There is a faint numbness and discomfort in the back
sore back
back spasm
Small blisters on the back
Long pox in back
Cupped ear
Explosive diarrhea
Macula
Fury
Violent impulse
Macular papule
alopecia areata
Leopard shaped fundus
Overeating
Tyrannosa
Abdominal pain after violence
Fulminant pain
Sleep disorders with insomnia
Chest pain after satiety
Baby lack of security
Adhesion of prepuce
bladder stone
Valve thickening
Thickening of valve lobule
With vivid and vivid horror illusion
With membrane mucosal hemorrhage
Hypertension
Galactosemia
Gradually decrease in intelligence after half a year or one year old
Hemifacial dysplasia
Candida albicans infection
Signs of sepsis
septicemia
100 specific symptoms
White slag like snot
Leukemic cell infiltration
Leukocytosis
Leucouria
Leukopenia
Closed Comedo
Bite your teeth unconsciously during the day
White urine
White mucinous urine
White Dew
White nail
Pseudomembrane formation of diphtheria
White rice
Leucorrhea
Leucorrhea increased
The wound will not heal after tooth extraction
Bleeding after extraction
hypertrophic scar
Scar formation
Scar constitution
Scar itch
Eight character foot
Bifidoma
Suffocating
Incomplete atrioventricular block
The wrist and the distal finger joint of the small finger of the ring cannot be bent to the ulnar side
Close your eyes and shake your head
Marginal ulcerative keratitis
Spherical capsule can be seen in glass
The vitreous body protrudes into the anterior chamber through the pupil
Persecuted delusion
Red and red
Blood is fresh and red
Tarmac
The blood of the stool is dripping or spraying
Hemifacial atrophy
Cold back
The inability of the palace to receive the essence
Irregular uterine bleeding
Bosch line
Involuntary movement
Red and swollen skin pain of nasal vestibule
Turbid liquid of nose
Thick nasal beam
Vitreous shake
The common castor skin debris in castor
Pityriasis albicans
Abnormal prepuce
Exfoliative dermatitis
Lichen planus
Diverticulum of bladder
Unstable angina
amygdalitis
Performance personality disorder
Pathological arson
Pathological theft
Pathological gambling
Pathological intoxication
Obturator nerve damage
No row
Stink
allergy
Flat pelvis
Pain
Syndiosis
Incomplete abortion
Insufficient endowment
Nevus epidermis
White Medium hair green
Budd Chiari syndrome
Nose is rough
Pulsatile mass
Pathological myopia
No more disgusting
Leucorrhea
Headache aggravating in the morning
Conductive deafness
Tidal breathing
Chen Shi breathing
Postpartum blood release
Adult incontinence
Super high heat
Flaccid fever
Long term fever
Vomiting in the morning
Vomiting after meal
Vomiting after dinner
Vomiting immediately after meal
Persistent chest pain
Pituitary dwarfism
Osteogenesis imperfecta
Traumatic shock
sudden death
Chronic Insomnia
Hypnotic dependent insomnia
Convulsions
Convulsive weakness
Postnatal breast distention
Postnatal neck soreness
Neck pain in the morning
Sores and poison sink in Cold War
Intestinal heat is strong and strong
Hot flashes
Colic
Persistent colic
Postpartum perineum pain
Persistent perineum pain
Persistent nausea
Persistent dysphagia
Incontinence of postpartum stool
Incontinence of anal sphincter
Denture tongue
noisy
Insect accumulation is fond of eating foreign bodies
Insect accumulation and nausea
Abdominal pain of navel with gastrointestinal qi stagnation
Intestinal damp heat less abdominal pain
Bowel ringing
Damp heat of stomach and bowel tinnitus
Cold and cold, cold semen
Recover the Yin and shrink after the treatment
Cold and cold, cold and Yin shrinking
Insect poison attacks itching on the head
Labial wind
Swollen lips
Insect poison attack hand and foot disdain
Insect poison skin blister
Broad bean size bright red spot
White spot of insect accumulation
Odontosis
Red pulse transmitting eyes
Sagging of red film
Abnormal bowel sound
Bowel sounds weaken
The bowel sounds disappeared
Hyperactivity of bowel sounds
Bowel sound enhancement
Persistent anal pain
Old anal fissure
Frail anal fissure
Postpartum abdominal pain
Postpartum avalanche
Postpartum vertigo
Postpartum fever
Postpartum spasm
Postpartum stool is difficult
Postpartum urination is difficult
Frequency of postpartum urination
Incontinence of postpartum urination
Postpartum urination and gonorrhea
Postpartum milk from
Postpartum edema
Postpartum low back pain
Postpartum pain
Chong Ren wet hot sexual bleeding
Never cry at first birth
Pale suffocation does not cry
Primary non milk
Primary eyes are rotten
Primary diarrhea
No first born stool
No way to have a baby
pill rolling tremor
Muscle strength of flexor carpi ulnaris
Muscle strength of extensor carpi ulnaris
Bayonet hand
Ulna periosteal reflex is inverted
Cauliflower ear
Pannus of vermin
Chong Ren blood deficiency after menstruation error
The mistake after menstruation
Chong Ren is wrong after cold condensation menstruation
Hyperemia splenomegaly
Duck egg odor
Postpartum incontinence
Overflow incontinence
Postpartum urinary retention *
Postpartum dysuria
Food reflux after meal
Excessive menstruation of Chong Ren and deficiency cold
Abdominal pain in the process of Chong Ren Xu Han classic
Emaciation of insect
dementia
Sudden fall
Wheezing
Gasp for breath
sobbing respiration
Positive for the zemak Helin test
Sudden fall
Labial deformity
Disdain of lip angle
Cleft lip
Blister of lips
Numbness of lips
Tenderness in the lateral abdominal wall or back waist
Brown skin rash
Pestle finger
Pilonidal sinus
Intestinal stasis
Acne like rash
rub one 's hands and stamp one 's foot -- get anxious and impatient
Fragile X syndrome
Venation
Thyrotropin releasing hormone deficiency
No fixation
Estrogen deficiency
Deformity of lip crease
Long pox around the lip
Round or oval red spot of lip
Labial valgus
There are small blisters on the lips
Thick lips and large tongue
Dry lip red
Dry lips
Cleft lip and palate
Vertical neglect
Hypophyseal amenorrhea
pituitary crisis
Coma after hypophysectomy
Hypophysis dysfunction
Hypophysis
trauma
Traumatic uterine adhesions
Beaded rib
Block of conduction
Conductive abdominal pain
Conductive tinnitus
Change skull damage by chiseling
Penetrating skin degeneration
Sichuan character pattern
No sense of pulmonary artery closure in palpation
Tactile disorder
Hymen atresia
The first baby is in a dwarf state
Hemorrhagic papule
Hemorrhagic infarction
hemorrhage
Larynx
Toxic particles appear
Dysentery
Congestive heart failure
Plexus sciatica
Four concave signs after birth
There is a continuous blue and purple after birth
Abnormal sweating
Cold sweat
Swimming edema with bee sting
Open and closed
Red cord, wandering superficial vein
Adrenergic dependence
It is frothy and has stench and smell.
Necrosis of hypophysis after partum
Postpartum obesity
postpartum astriction
The postnatal bad dew is not clean and smelly
Postpartum ptosis of chest
Postpartum metrorrhagia
Postpartum hair loss
Blepharoedema in the morning
Soreness of the neck and back of the mother
Back pain after too much childbirth
Prenatal depression
Hematoma of the birth canal
Flat stenosis of the birth canal
Laceration of the birth canal
The delusion state of the puerperal period
Puerperal dew
Delirium during puerperal period
The state of restlessness during the puerperal period
Megacephalic head
Long head deformity
Pain in the front foot after long or intense exercise
Swelling pain of long bone
Long bone is thick
Intestinal tuberculosis
intestinal hemorrhage
Intestinal atresia
Mesenteric cyst
Intestinal stenosis
Intestinal perforation
intussusception
Enterospasm
Intestinal infarction
Enteroparalysis
Intestinal adhesion
Necrotic ulcer in intestinal mucosa
Intestinal mucosa exfoliation
Fork
Increased absorption of water in the intestine
Decreased intestinal tension
Intestinal transport disorder
Intestinal Ascaris infection
Distort of intestine
Thickening of intestinal wall edema
Fibrosis of intestinal wall
Necrosis of intestinal wall
Extreme behavior after childbirth
Extremely weak after birth
Postpartum depression
Postpartum haemorrhagia
Postpartum blood Qi pain
Postpartum sweating and sweating
Gingival lead line
postpartum hemorrhage
Gingival hyperplasia
Postpartum headache
Menstruation after childbirth no longer
Alveolar atrophy
Postpartum finger pain
No milk secretion after delivery
Postpartum uterine contraction
Postpartum thirst
Postpartum abdominal pain
Frequency of postpartum urination or incontinence
Pain or vaginal distension after postpartum
Impulse destruction
Impulsive personality disorder
Lateral rib pain
Unstable holding
Continuous low fever
Sustained muscle contraction
Persistent abdominal pain
Persistent dizziness
Persistent fever
Persistent relaxation
Persistent urinary protein
Persistent cough
Persistent chest pain or blurred back pain
Persistent pain
Persistent severe shoulder pain
Persistent low back pain with morning stiffness
Continuous high fever
Nasal congestion in the lower nasal cavity when lying on the side
Continuous intracranial murmur
Fetal cerebral ventriculomegaly
Tic disorder
Fear of place
Cramps
Tingling
Tooth delay
Gear sample strength and straightness
The gingiva has blue lines
The appearance of adult is still like a child
Mass of shame area
Suprapubic pain
Spasmodia of the pubic rectum
Separation of pubic symphysis
Lip is pale
Fracture of residual plant
Suspicion
Spasm and pain in the lower limbs of the two legs after excessive drinking
sodoku
Diffuse acute pain in the neck and back at morning
Morning foreforehead pain, afternoon relief
Morning stiffness
Tears are sticky
Asthma
Channeling pain
Sweat
Hot and hot cheekar
Postmeal onset abdominal pain
Postprandial hypoglycemia
High blood glucose after meal
Dementia face
A silly laugh
Gingival redness
Poor pearl pain
Adult hyperactivity
Gingivitis
Fat skin swelling in the morning
tremble
Reduced intestinal peristalsis
Gastrointestinal bleeding
Postprandial syndrome
Flatulence
Irritable bowel syndrome
Intestinal backup
Lamellar Ichthyosis
Intestinal vascular malformation
Paralyzed bowel paralysis
Atrophy of villi
Intestinal peristalsis slowed down
Intestinal dysfunction
Enteropneumatic cyst
Long vein
Tourette's syndrome
Hot and hot
Autosomal aberrations
Lateral branch circulation is not fully developed
Puerperal infection
Abnormal productivity
Less sweating
Irritating cough
SUPERMALE
Hyperemia
Adult growth hormone secretion is insufficient
Superfemale
The weakening and disappearance of pulsation of ulnar or radial artery
Slow pulse
CO2 retention *
Postprandial hypoglycemia
Extended production for more than 24 hours
Pain on top
Unilateral headache
Massive hemoptysis
Sit and breathe
Monopular nystagmus
Drop of blood
incontinence
Low fever
hypotension
motility diarrhea
Metabolic disorder hiccup
A lot of pleural effusion
Symmetrical chest pain
Transient chest pain
Unilateral renal enlargement
Simple tall body
Compensatory hyperappetite
Simple obesity
Simple emaciation
Symmetrical myasthenia
Hypovolemic shock
Transient insomnia
Short term insomnia
Transient oversleep
A short coma
simple syncope
Hypoglycemic syncope
Transient syncope
Unilateral breast pain
Unilateral nipple discharge
Single orifice nipple discharge
Multiple empty nipple discharge
Unilateral breast mass
Short neck deformity
Simple goiter
Simple goiter
Toxic nodular goiter
Endemic goiter
But the heat is not cold
Large intestine damp heat invigorate heat
night sweat
Fecal incontinence
Spit too much
Large intestine is damp and hot, tongue coating is yellow and greasy
The pulse is not good for the waist
Shortness of breath
Single abdominal distension
Single abdominal enlargement
Loose stools
Purulent blood in stool
Constipation
Difficult defecation
Large intestine heat knot difficult
Scalp desquamation caused by toxin
Toxic heat acne
Toxic heat and red nose
Erythema Butterfly
Toxic heat and blister
Toxic heat and skin pain
Toxic heat and desquamation
Miliaria caused by toxic heat
Toxic and pathogenic skin atrophy
Toxic heat accumulates white shad
Pemphigus with toxic heat
zoster
Red bayberry sores
Bayberry sores caused by toxin
A large amount of thin nose blocked sneezing
Stagnation of heat and loss of smell in gallbladder
Trichiasis
Change of stool habits
Frequent defecation
Thin stool
Dry stool
Purulent stool
Flat stool
Green stool
Red stool
The stool is not formed
Low anal deformity
Abnormal vaginal bleeding after banding
Dansha
Hot and poisonous varicella
Toxic heat retention erysipelas
Poisonous heat and powerful erysipelas
Toxic heat stagnates skin red line
Red line of skin in blood
Defecation deformation
Abnormal muscle strength of adductor magnus
Abnormal muscle strength of deep flexor of the third and fourth fingers
Contralateral synkinesis
Polysylla
Low ear
Cholestatic hepatomegaly
Metabolic hepatomegaly
Biliary ascites
Monologue
abnormal sweating
Timid Qi, timid insomnia
proteinuria
Polyuria
epilepsy
Hypopnea syndrome
snore
Laughing phenomenon
hyperhidrosis
Phenomenon of arterial streak
The phenomenon of unclear answers
Davis sign positive
Metabolic acidosis
Metabolic alkalosis
Hypomagnesemia syndrome
Hypokalemia syndrome
Hyponatremia syndrome
Dalinpur stellwag sign
Epilepsy triad
Indifference
Salivation
Slow reflection of light
Drink more
Cockeye
Epileptic headache
Cerebral ataxia
Lots of skin desquamation
Muscle paralysis below thigh or knee
Local swelling and deformation of thigh
Tingling in the thigh
Epileptic personality change
squatting position
After squatting up, eyes darken
hha
Retention of urine *
Capitalization syndrome
Sweating and dizziness
The labia major or anus are of different sizes, soft in texture and without tenderness
Melanosis of large intestine
Arcuate membrane
Percussion pain of greater trochanter
The stool is dry and beaded
Blue stool
Light stool color
The stool is brown
The stool becomes thin and looks like a pencil
Sticky stool
Polydactyly
Eat more
yawn
sneeze
Multiple organ failure
Electric shock like pain
An electric or tingling headache
Compensatory lumbar lordosis
Dull
Chronic cough, expectoration and wheezing in winter and spring
Itchy navel
Hypovolemic shock
Hypoglycemic coma
Erysipelas like appearance
Hypoglycemic convulsion
Low intestinal obstruction
Low back pain
Hypothermic coma
chilblains
frozen stiff
Polycystic ovary syndrome
Suspicious
Multiple rib fractures
Erythema multiforme
Sweating evil wind
Sweaty and smelly
Drug dependence
Symptoms of muscarinic poisoning
Abnormal love of female objects
Loss of interest in life
Intolerance of fatty diet
I can't distinguish red from green
Sensitive to sound
Overreaction to auditory, visual and tactile stimuli
Contralateral hemiplegia
Arterial hemorrhage
Decreased arterial oxygen saturation
The arteries were elongated and twisted in many places
oculogyric crisis
Oculomotor paralysis
Bring down red and white
Bloody secretion
Bloody mucopurulent nasal discharge
Herpes zoster like appearance
Maplike bone defect
Dull pain
Bile reflux
Bile overflow
Solitary solid nodule
Simple myopia
Biliary cirrhosis
Simple cervical erosion
Obstruction of bile excretion
Simple fracture
Cholestasis
Retention of bile *
simple drunkenness
Hyperbilirubinemia
Unilateral and pseudokinesis
Biliary colic
Biliary atresia
Granulomatous changes were found in unilateral fundus
biliary tract dyskinesis syndrome
Monocular blindness
One eye suddenly appears transient amaurosis
Biliary obstruction
Black shadow in front of one eye
Cholinergic crisis
One leg squat pain
Monoplegia
Bile duct obstruction
Bile duct rupture
Cholecystalgia
Gallbladder dysfunction
Nodding sign
Gallbladder dyskinesia
Punctate hemorrhage
Reduction of gallbladder volume
Punctate acne
Hypersensitivity of gallbladder
Hydrops of gallbladder
Empyema of gallbladder
Gallbladder tenderness
Gallbladder enlargement
Gallbladder wall thinning
Hair breaking mania
Disorientation
Location signs
Localizing neurological signs
Intermittent muscle contraction
Amyloidosis
Amyloid deposition
Difficulty in reading small characters and color discrimination
The shoulder test was positive
Acne
smallpox scabs
Sinus arrest
Sinoatrial block
Tardiness
Sinoatrial node disease
Fall attack
Drop cornea
Butterfly fracture
Deformation of sella turcica
Sellar vacuole
Acrocephaly
Transient vertigo
Shortening tongue
Negative balance of nitrogen
Isotonic urine
Paresthesia of contralateral upper or lower limbs
The opposite side of the body pain or loss of temperature
Hypocompleminemia
atherosclerosis
Hypocalcemia
Hypokalemia
Hyponatremia
Erysipelas
Hyperhidrosis
Intracranial hypotension syndrome
Biliary ascariasis
Single episode depression
Hypochloric alkalosis
Transient complete amnesia syndrome
Patent ductus arteriosus
Dou Daoxiang
Choledocholithiasis
Hypoproteinemia
Hypomagnesemia
Hypoglycemia
Hypophosphatemia
Toxemia
Azotemia
Short neck
Gallstone
Massive hepatocyte necrosis
Gallbladder heart syndrome
Fibrosis of gallbladder wall
Methionine malabsorption syndrome
Epilepsy and epileptic seizures
Hypophosphatemia
Hypokalemia
gallstone
Calcium bilirubinate stone
Multiple personality disorder
Laugh on the floor
Bellyache
Duchenne muscular dystrophy
Arterial steal
Multiple nodules
Secondary sex change
Generalized tonic clonic seizures in epilepsy
Hypoglycemic hypothermia
Hypocitrinuria
Hemophilia
Complex partial seizures of epilepsy
Action like wall
Multiple punctate ecchymosis
Bullae (purulent fluid)
Toxic manifestations
Single or double horn uterus
Sacrococcygeal sinus formation
Multiple neuritis
Computer agraphia
Low heat and fatigue
Soft leg
Lateral thigh pain
Muscular atrophy of thigh
Brain development disorder
Large artery blood supply disorder
Compensatory effect
hypoxemia
Single elevated ALT
Generation pulse
Unilateral nasal obstruction
Polyclonal cryoglobulinemia
Simple partial seizures of epilepsy
Absence seizures of epilepsy
Autonomic seizures of epilepsy
Arteriovenous short circuit
Bile duct injury
Hiccups
Sacrum cyst
Sacral fissure
Lumbosacral spondylosis
Sacrococcygeal fusion
Acute sacrococcygeal abscess
Sacroiliac joint pain
Transposition of great arteries
Electro mechanical separation phenomenon
Electrophysiological abnormality
No response to language
deaf
Retrocochlear deafness
Cochlear deafness
Hemoptysis in children
Dyspnea in children
Malignant positional nystagmus
Malignant high fever
hiccup
Hiccup syndrome
Hiccup heat syndrome
Hiccup and chills
Hiccup deficiency syndrome
Malignant pleural effusion
Childhood insomnia
Sleep disorders in children
Aversion to cold
The aversion to cold without sweating is more serious
Aversion to cold with dry mouth and dry throat
When the cold is not hot, it starts and stops
Aversion to cold
The chills are so severe that they are faint
If you are averse to cold, you will shiver and fever
Aversion to cold limbs, chest tightness and vertigo
nausea
Dysphagia in children
Fecal incontinence in children
tinnitus
Ear distension
Pus in ear
Anal pruritus in children
There is no less lochia
Lochia
Auricle deformity
Cleft earlobe
Adhesion of earlobe
Earlobe defect
Too large earlobe
Small earlobe
Pseudocyst of auricle
Auricular valgus
Auricular depression
Earache
Auricular traction pain
Auricular pain
Radiation pain of auricle
Ear root pain
Retroauricular pain
Ear nucleus swelling and pain
Ear pain
Auricular neuralgia
Otogenic earache
Blockage of auditory canal
Ear canal scratch
Empyema of ear canal
Ear canal bleeding
Foreign body in ear canal
Ear canal stenosis
A lot of earwax
Ear canal laceration
Perforation of tympanic membrane
Rupture of tympanic membrane
Retroauricular lymphadenopathy
Parinaud oculoglandular syndrome
Malignant melanoma
nightmare
Vestibular imbalance
Impaired vestibular function
Retroauricular mastoid edema
Retroauricular erythema
Tinea auriculae
Auricle redness and swelling
Laceration of auricle
Auricle abrasions
Acne in earlobe
Ear mass
Ear itch
Sense of occlusion in ear
Ear plug
Ear tightness
Otorrhea
Gooseneck deformity
Crocodile tears syndrome
Gooseneck neck
Face of mitral valve
Thrush
Blink syndrome in children
Frontal pain
The horizontal lines of forehead are deepened
Acne on forehead
Sweating on the forehead
A sudden increase in wrinkles on the forehead
Leukoplakia frontalis
Ears, nose and cartilage turn blue
Soft solid mass in the infraauricular region
Swelling in the ear
Tumors in the ear foramen
Low ear position
Ear frostbite
Hyperalgesia or hypoesthesia below the ear apex line to the hairline
Tinnitus
There are hard lumps in the earlobe
Adhesion of earlobe
Auricle protrusion
Otosclerosis
foreign bodies
Ear canal bleeding
Cochlear deafness
Laceration of auricle and auditory canal
Auricular pain
Auricle traction pain
Localized cyst of ventral auricle
Otogenic tetanus
Fetid stool
Frontal mass
Otogenic vertigo
Peptic ulcer in childhood
Cachexia
Pernicious anemia
White feces with bad breath and multi bubble smell
Acidophilic substance
Eat cold food
Overgrowth in childhood
Recurrent fracture in children
Children's withdrawal behavior
Childhood dystonia
Dinucleotide aminoaciduria
Dicarboxylic amino acid urine
Children's bed wetting
Hip pain in children
Cachexia acne
Childhood phobia
Association and affective disorder in children
Bone defect in children
Children's behavior is eccentric
Auricular focal cerebral fever
Obstruction and swelling of ear orifices
Children dare not sleep on their back
Gender bias in children
Excessive catecholamine secretion
Psychomotor dysplasia in children
Migraine in children
There is no end to lochia
Mitral valve prolapse
Headache attack after taking medicine
Wind cold pregnancy cough
Wind heat pregnancy cough
Dissociative nystagmus
Febrile delirium
fever
Non infectious fever
diarrhea
Secretory diarrhea
abdominal pain
Abdominal colic
Abdominal burning pain
Abdominal scalpel pain
Abdominal drilling pain
Abdominal pain
Blunt abdominal pain
Abdominal distension
Repeated hematemesis
Reflex vomiting
Reflex hiccup
Asymmetric chest pain
Radiation chest pain
Lung abscess and chest pain
Obesity
Syndrome of lung heat and fluid injury
Repeated convulsions
Reflex syncope
Non lactation nipple discharge
Asymmetrical tension cervical reflex posture
Non infectious laryngeal edema
Fever and fear of wind
Fever and fear of cold
The wind cold attacks the exterior, the aversion to cold and fever
Wind heat attacking lung, aversion to cold and fever
Rheumatism is characterized by aversion to cold and fever
The lung is hot and vigorous
Low fever due to yin deficiency of lung and stomach
There is no sweat on the surface of wind cold
Spontaneous sweating of rheumatic injury
Spontaneous perspiration due to lung deficiency
Peritoneal irritation
Abdominal pain
Abdominal pain
Stomachache after meals
Heartburn after dinner
Wind evil attacking mouth and eye
The wind phlegm enters the collaterals, and the mouth and eyes are askew
Wind cold exterior syndrome of mouth silence
Lung dryness, fluid deficiency and thirst
Salivation of meridians in the wind
Wind and phlegm enter the collaterals and salivate
Lung heat burns tongue
Wind phlegm suppresses strong tongue
Wind and phlegm disturb the tongue
The tongue coating is white when the wind is cold
Toothache caused by wind heat
Wind cold toothache
The wind and cold attack the collaterals, and the teeth are weak
Gingival swelling and pain due to wind heat
Wind heat chancre
The teeth of the air-cooled passenger are blackened
Wind evil obstructing collaterals and limb pain
Numbness of meridians and limbs in wind
Wind phlegm obstructing collaterals numbness of limbs
Wind, cold and dampness block limb rigidity
Wind evil invades limb rigidity
The wind and cold bind the extremities
Wind evil blocking limbs convulsion
Convulsion of limbs due to wind phlegm with blood stasis
Women dancing in pregnancy
Lung heat, body fluid, injury and flaccidity
Fengsheng Xingbi joint pain
Cold shoulder pain
Arm pain caused by wind cold and dampness
The wind and phlegm enter the collaterals, and the hands tremble
The wind and cold strike the collaterals and the hands tremble
Wind evil attacking foot heat
Foot pain due to rheumatism
The wind and cold attack the tendons
Wind cold and dampness block heel pain
Wind, cold, dampness, foot tremor
Wind and cold bind the surface and back
Lung fire and back heat
Wind cold dampness lumbago
Wind cold dampness block lumbago
The wind is cold and the waist is cold
Lung heat expectoration
Lung cold expectoration
Wind evil attacking lung and expectorating phlegm
Lung heat accumulation and hemoptysis
Wind cold and closed lung asthma
Wind heat attacking lung asthma
Asthma due to deficiency of both lung qi and Yin
Wind cold binding lung chest tightness
nausea causing
Abdominal muscle contracture
Abdominal mass
The stomach shows green tendons
abdominal fullness
The abdomen is hard and full
Abdominal cold
It is difficult to defecate due to lung qi deficiency
Large intestine and hematochezia forced by wind and fire
Loss of lung qi is not good for urination
Obstruction of lung qi and urination
Frequent urination due to deficiency of lung and spleen qi
Urinary incontinence due to deficiency of lung and spleen qi
Lung qi deficiency and cold enuresis
Wind heat and scalp desquamation
Wind heat disturbing head and face itching
Baldness with wind heat and poison
Acne
Acne due to stagnant heat of lung meridian
Lung stomach heat and red nose
Labial swelling due to wind heat
Rheumatic lip swelling
Rheumatism accumulated skin, hand and foot desquamation
Rheumatic nail variation
Rheumatic disease, Qi numbness
Rheumatic pruritus
Pruritus due to excessive wind
Wind cold and pruritus
Wind heat external attack desquamation
Rheumatism and desquamation
Rubella
Skin rubella caused by wind heat
Skin rubella with wind cold
Rheumatic blister
Miliaria due to rheumatism and blood stasis
Miliaria due to heat in lung and stomach
Wind heat and wart
Wart vegetation caused by wind heat virus
Prickly heat
Wind cold obstructing collaterals and cat's eye sore
Cat's eye sore caused by wind heat
Wind heat evil lung deafness
Wind heat evil lung tinnitus
Wind cold attack lung ear distension stuffy
Wind heat causes lung and ear distention
Wind heat and dampness are toxic and ear itching
Wind heat toxin otodynia
Wind heat disturbing ear pus
Sneezing due to wind and cold
Wind heat attack lung sneeze
Sneezing due to deficiency of lung qi
Wind heat nasal obstruction
Cold and stuffy nose
Stagnant heat of lung meridian and nasal obstruction
Deficiency of lung and spleen qi and nasal obstruction
Deficiency of lung and kidney yin and nasal obstruction
Wind heat and runny nose
Wind heat causes lung and nose itching
Dry heat of lung meridian and itchy nose
Wind heat obstructing lung and sour nose
Cold and sour nose due to lung deficiency
Deficiency of lung and spleen qi and sour nose
Excessive heat in lung meridian and dry nose
Lung dryness, yin deficiency and nose dryness
Deficiency of lung and spleen qi and dry nose
Wind cold to relieve epistaxis
Wind heat obstructing lung and epistaxis
Wind cold dampness pathogenic nasal pain
Wind heat obstructing lung and nasal pain
Hyperactivity of lung stomach heat and nasal pain
Wind heat and anosmia of lung meridian
Deficiency of lung and spleen and anosmia
Wind is hot, eyes are afraid of heat
The wind and phlegm disturb the eyes
Partial vision of collaterals in wind evil
Windy heat attacking eyes
Abdominal swelling
Abdominal mass
Reflex incontinence
Nonspecific perianal abscess
Non fistula abscess
Postpartum fever caused by pathogenic wind
Spasm after wind cold
Postpartum pain due to wind cold
Abdominal pain in women
The wind is cold and the outside is cold
Accumulation of heat in lung and spleen and red and rotten eyes
Deficiency of lung qi and weakness of fetus
Severe fever, slight fear of wind
Wind heat suckling moth
Milk moth with lung stomach heat
Milk moth with weak lung and stomach
Children's hoarseness caused by wind heat
Wind cold invades children's hoarseness
Children's hoarseness due to heat accumulation in lung and stomach
Children's hoarseness due to yin deficiency of lung and kidney
Oral sores caused by wind heat and spleen
Treatment of lung and stomach yin injury with waste heat Dan Sha
Cough due to wind cold and phlegm
Cough due to deficiency of lung and spleen
Wind heat stagnation and sudden cough
Cough due to deficiency of lung yin
The wind is hot and the gills are hot
Lung heat, body fluid and thirst
Obesity due to lung qi deficiency
Wind cold diarrhea
Frequent urination due to lung qi deficiency
Wind cold five hard
Wind heat, phlegm and buccal ulceration
Wind cold, kidney deficiency, buccal ulceration
Heat of lung and stomach causes sores in neck
Wind phlegm stasis stagnation phlegm core flow
Wind cold invading unknown swelling toxin
Perianal ulcer toxin due to deficiency of lung, spleen and kidney
Wind fire dryness and anal hemorrhoids
Wind heat stagnation toxin and anal warts
Abnormal abdominal muscle strength
Abnormal sartorius muscle strength
Abnormal muscle strength of peroneus longus and peroneus brevis
Abnormal gastrocnemius muscle strength
Reflection anomaly
Abnormal abdominal wall reflex
The reflex is weakened or disappeared
Hyperreflexia of rectus abdominis
Reflex otodynia
Wind cold and itchy throat
Wind heat and itchy throat
Lung dryness and throat itching
Lung yin deficiency and throat itching
Wind heat attacking lung and dry throat
Lung yin deficiency and dry throat
Emphysema due to wind heat
Excessive heat in lung and stomach and swelling of pharynx
Yin deficiency of lung and kidney and pharyngeal swelling
Wind heat and sore throat
Cold and sore throat
The wind is cold and the voice is hoarse
Wind heat and hoarseness
Hoarseness due to yin deficiency of lung and kidney
Yin deficiency of lung and kidney and white rot of throat
Excessive heat in lung and stomach and white rot in throat
Foreign body sensation in pharynx due to lung heat and yin deficiency
Wind heat and itchy eyes
Wind cold and itchy eyes
Emphysema of lung and spleen, eyelid swelling
Erysipelas of eyelid caused by wind and heat
Wind heat invading the eyelid
Wind evil enters the upper cells of collaterals
Excessive wind heat and intracellular raw meat
Wind heat accumulation trichiasis
Lung spleen qi deficiency trichiasis
Wind heat attacking lung, white eyes and chancre
Lung meridian wind heat fish cells
Fish cells with lung fire
Wind heat attacking the lung, white eyes bleeding
Wind cold attacking lung, white eyes bleeding
Pterygium with heat accumulation in lung meridian
Red bean on lung meridian
Red bean on lung and liver stagnation heat wheel
Wind heat and clouds
Rheumatism with fever and pupil narrowing
noninfectious splenomegaly
ascites
Non portal hypertensive ascites
Ankylosis of abdominal muscles
Non oral halitosis
Putrid halitosis
Facial acne before lung heat menstruation
Wind heat meridian itching
Wind cold meridian itching
Wind phlegm meridian convulsion
Hoarseness due to wind cold
Lung yin deficiency and hoarseness in pregnancy
Rubella gravidarum due to wind heat
Excessive heat in lung and stomach and distended heart and abdomen in pregnancy
Abdominal pain in pregnancy due to wind cold
Geomantic omen
Wind and cold bind exterior body pain
Paralysis due to deficiency of lung and stomach fluid
Hemiplegia of meridians in the wind
Cold attack collateral numbness
Edema
Wind cold attacking lung edema
Wind heat attacking pulmonary edema
Lung yin deficiency and emaciation
Rubella with wind heat and dampness
Rubella on the surface of wind cold
Fahuang
Rheumatic heat stagnation and dysphoria
become yellow
Go mad
Crazy
Wind phlegm blocking epilepsy
Lack of lung qi
Fu Heat fumigation
Wind, phlegm, internal closure, dizziness
Aphasia due to wind phlegm
Irritability
Lung Qi loss of sleep
Wind and cold bundle surface rodent
Abdominal mass
brittle crisis
Paroxysmal sleeping sickness
Paroxysmal sleep
Obesity - dyspnea syndrome
Pulmonary artery murmur
Pulmonary hemorrhage
diplopia
Reharmony
Fisher test positive
Fibular reflex positive
Abdominal wall defensive reflex
Reflection fatigue
Separable strabismus
Positive counter attack sign
Positive for compression test of gastrocnemius
Von greyer levy
Axe like face
Gangrene
Radioactive infertility
Non depressive edema
Growth retardation
Gastrocnemius spasm
Slow response
Repeated upper respiratory tract infection
Repeated and unremitting urinary tract infection
Recurrent genital ulcer
Recurrent right lung infection
Recurrent herpes zoster
Repeated fever
Repeated atelectasis
Repeated high heat
Repeated cold
Lick lips repeatedly
Recurrent epistaxis
Reflex lumbago
Interruption of Reflection Arc
Goiter after delivery
Schizophrenic personality disorder
Papule
Square shoulder deformity
After dinner, the mouth is weak
Palpitation after dinner
Heart rate quickens after dinner
Sleepiness after dinner
Psychosis between episodes
Paroxysmal involuntary exercise
Paroxysmal muscular stiffness of limbs
Vomiting water
Vomit
paroxysmal cough
Paroxysmal vertigo
Paroxysmal drowsiness and hyperappetite
Paroxysmal giggle
Pain in the hair
Developmental pelvic abnormality
Developmental malformation
Pronunciation change
Dyslexia
Fever with bleeding
Fever with rash
Fever with abdominal pain, diarrhea, nausea, vomiting
Fever with joint swelling and pain
Fever with frequent urination, urgency, pain and back pain
Fever with eye congestion
Fever with enlarged lymph nodes and pain
Fever with chills
Red complexion
The shadow of the lower lobe is segmental or large leaf
More pulmonary portal shadow
Pulmonary door widening
Atelectasis
Pulmonary cavity
Epididymis enlargement and hard hair
Epididymis cyst
Round or cystic mass in the lung
Intrapulmonary lesions
Pulmonary air pressure injury
Hyperinflation of lung
Very little pulmonary blood flow
There is a lot of pulmonary blood flow
Pulmonary blood increase
pulmonary edema
Reduced lung texture
Increased lung texture
Thickening of lung texture
Alveolar hemorrhage
A large number of amorphous debris can be seen in Alveoli Lavage
pulmonary embolism
Pulmonary hydrops
The appearance of texture thickening and infiltration around the lung or bronchus
Lung mass
Lung volume reduction
Imbalance of pulmonary ventilation blood flow ratio
Pleural effusion of lung cancer
Non depressed myxoedema
Asymmetrical joint pain
Non blood ascites
Non pregnant enlargement of lower abdomen
Mental disorders caused by non dependent substances
Flying mosquito
Velamentous placenta
complicated drunkenness
Repeat hearing
Hypertrophic nodule fibroid hyperplasia
Positive fata response
A painful nodule or fat mass
Fat lines
Obesity hypoventilation
Pre obesity
Retroperitoneal fibrosis
Disused amblyopia
Farting too bad
Farting frequency
Injury of brachial plexus and lumbosacral plexus after radiation Radiation pain
Cyanosis
Crawling rash
Pink foam sputum
Comminuted fracture
Vexed fever
Drink more when you are thirsty
I am tired and thirsty and drink cold
Restlessness
Lack of room
Atrial premature beat
Tachyarrhythmia of atrial escape
Room separation
Atrioventricular block
Atrioventricular tube malformation
Accessory ear
Extensive calcic deposition of abdominal wall
The abdominal wall reflex is weakened or disappeared
There is swelling protruding at the incision of abdominal wall
Abdominal wall not autonomous axial motion
Mass at midline of abdomen
Dry wrinkles of abdominal skin
Signs of abdominal "flexibility"
Local or extensive abdominal pain, rebound pain
Fecal samples from abdominal wounds
White, pink, or purple on abdominal skin
Abdominal tenderness
The outer abdominal wall is covered with fixed tenderness
Abdominal "gas string" mass
The abdominal depression is boat shaped
Large soft masses accessible to the abdomen
Erythema of abdominal wall
Fury of abdominal vein
Abdominal pain does not eat
Abdominal discomfort
Abdominal vascular murmur
Fat abdomen
Abdominal hemorrhage
Abdominal blood accumulation
Abdominal swelling
Abdominal cavity implantation
Abdominal infection
Abdominal pain with diarrhea
Abdominal pain with blood
Abdominal pain with hematuria
Abdominal pain with nausea and vomiting
Abdominal pain with jaundice
Detection of Schistosoma eggs by biopsy of intrafecal or rectocellular sigmoid colon mucosa
Abdominal pain, fever and jaundice
The deformation of the fecal column becomes thinner
Brown fruit skin or hair in feces
Abdominal pain with shock
White patches found in feces
Eggs or pregnancy segments found in feces
Increase of fecal choledochogen excreted from feces
Feces green
Fecal abscess
Abnormal fecal discharge process
To be bound as sheep dung
Less feces
A lot of feces
Fecal impaction
Roundworm of feces
Fecal vomit
Turning over difficult
Rash like rash
Tenderness of gastrocnemius
Injury of gastrocnemius muscle
Spasmodic pain of gastrocnemius
Gastrocnemius muscle is strong and contraction and has pain
Gastrocnemius tear
The symmetrical atrophy of fibula muscle gradually develops upward
abdominal distension
Dissociative sensory disturbance
abdominal distention
peritonitis
Wind
pulmonary infection
Pulmonary artery stenosis
Alveoli inflammation
pulmonary heart disease
Enlarged lymph nodes of groin
Honeycomb lung
Pulmonary arteriovenous fistula
pulmonary fibrosis
Complex ulcer
Dissociative forgetting
Ascites
Convulsion of abdominal muscles
Abdominal cocoon
Abdominal tension
Increased abdominal pressure
Abdominal circumference enlargement
Diarrhea and constipation alternation
Severe dysplasia of abdominal muscle
Cellulitis
Rheumatic multiple myalgia
The fixed mass of rectus abdominis muscle that touches the boundary is unclear
Abdominal obesity
inflammation
Obesity edema
dissociation fugue
Pulmonary fire
Recurrent depression
Weakness of abdominal muscle relaxation
Ventromedulia
Pulmonary interstitial fibrosis
Extrapulmonary symptoms
Asymmetric tension neck reflex
Deficiency of lung yin
Post attack mental disorder
Repeated infection
Swelling at groin or closure
A reproducible mass in the groin area
Complex urinary tract infection
Groin pain
Wind mass
Pulmonary hypertrophy
Generalized red plaque
Repeated bleeding
Epididymis stone
Dry skin and micro pulse
Cold and damp arthralgia
Floating vein
Venation
Pulmonary dyspnea
Abdominal abnormal breathing
Atrioventricular block
Lung involvement
Pulmonary metastasis
Atrial fibrillation
Pulmonary stenosis murmur
Pulmonary consolidation
Repeated pneumonia
Pulmonary dispersion dysfunction
Pulmonary atresia
Pulmonary congestion
Itch of groin
Reverse pulsation
Uterine bleeding after gynecological examination
Functional headache
Functional deafness
Sensorineural deafness
Sensorineural deafness
Dry cough
Dry cough and sound with itching throat
Dry cough and Qi promote sweating and cheekar red
Blood
Red blood
Pink blood
Black red blood
Rust blood
Functional constipation
Fruit sauce stool
Incontinence of anus
Sensory incontinence
High fever
Infectious fever
Hepatomegaly
Alpine diarrhea
autemesia
Liver Qi causes stomach vomiting
Menopausal obesity
Liver and kidney loss syndrome
Anaphylactic shock
Septic shock
Menopausal insomnia
Convulsions with high fever
High fever coma
Hepatocoma
Menopause breast pain
Infectious laryngossyema
High iodine goiter
High fever and headache cold limbs
Liver kidney yin deficiency and low fever
Axillary sweat with Yin deficiency of liver Yang
Sweat in the liver and gallbladder
Induction abdominal pain
Functional chronic pelvic pain
Sensory incontinence
Functional incontinence
Anal sphincter relaxation
Vorticity of the mouth of the moving mouth in the liver wind
The vortex of the mouth of the stagnation of liver Qi
Liver, gall, heat, bitterness
Deficiency of liver and kidney yin
Liver wind and tongue tremor
Liver wind and tongue numbness
Inflammation of liver and fire
Glossy tongue
Liver, gall, damp, hot, yellow and greasy tongue coating
Pain in limbs due to deficiency of liver and kidney
Numbness of limbs of liver Yang wind
Thin limbs of deficiency of liver and kidney yin
Liver Yang wind limbs strong straight
Deficiency of liver and kidney, limbs straightening
Liver blood deficiency deficiency limbs are in urgent need
Convulsions of limbs with liver depression and blood deficiency
Dancing and dancing with the deficiency of liver and kidney yin
Liver depression and blood deficiency
Liver and kidney loss and impotence
Joint pain
Pain of joint in deficiency of liver and kidney
Joint deformation
Joint deformation of deficiency of liver and kidney
Intrahepatic wind hand shaking
Liver kidney yin deficiency cinnabar palm
Pain of femoral Yin
Swelling and pain of knee in the deficiency of liver and kidney
Deficiency of liver and kidney yin and foot pain
Liver kidney deficiency and tendon change
Deficiency of liver and kidney, deficiency of foot and pain
Unstable gait of deficiency of liver and kidney yin
Deficiency of liver and kidney, weakness of waist and knee
Liver is wet and hot, and waist is like rope bundle
Stagnation of liver Qi
Stagnation of liver qi and choking
Liver Qi is the cause of stomach belching
Liver Qi is responsible for stomach swallowing acid
Liver stomach is not disgusting
Retching
Liver depression and retch
The liver and stomach are not noisy
Liver fire makes stomach spit blood
Liver Qi causes stomach anorexia
Chanji enjoys eating foreign bodies
Stagnation of liver qi and pain
Liver, gallbladder, damp, heat, threatening pain
Liver yin deficiency and threatening pain
Liver qi stagnation knot less abdominal pain
Liver cold and abdominal pain
Liver depression and qi stagnation abdominal tendon contracture
Liver, spleen, blood stasis, abdominal exposure of blue tendons
Kidney yin deficiency of liver and kidney exposed blue ribs in abdomen
Liver kidney yin deficiency single abdominal distention
Liver and spleen do not sound
Feeling the bloody stool of epidemic poison
Liver, spleen, qi stagnation constipation
It is difficult to have a stagnant liver temper
Deficiency of liver and kidney yin and blood relieving
Liver, gallbladder, damp and hot, urine, yellow and red
The stagnation of liver qi and the stagnation of the liver will not make it easy to urinate
Incontinence of defecation with deficiency of liver and kidney yin
Liver depression, qi stagnation, pain in urine
Wet and hot liver, gallbladder and blood urine
Liver stagnation and stagnation of Qi without ejaculation
Early discharge of liver through damp heat
Liver meridian is damp, hot and Yang strong
Testicular distention
Nail variation of liver depression and blood deficiency
Deficiency of liver and kidney Yin skin atrophy
Liver depression and qi stagnation skin brown spot
Liver depression, qi stagnation, skin black spot
Vesicles in Yin deficiency of liver and kidney
Liver qi stagnation knot urethra overflow pus
Deafness of liver and fire
Deafness of hyperactivity of liver Yang
Deafness of liver blood deficiency
Tinnitus of liver fire
Tinnitus of hyperactivity of liver Yang
Tinnitus with liver blood deficiency
Liver, gallbladder, damp, hot, ears distended and stuffy
Liver kidney yin deficiency ear distension
Hepatobiliary fever and otodynia
The liver fire is against the ear
Liver, gallbladder, damp and hot, and pus in ear
Dampness and heat of liver, gallbladder and congestion of nose
Liver fire is responsible for lung and nose
CRE hot attack lung and nose swelling
Liver, gallbladder, damp, hot, smelly nose
Liver meridian is solid heat, eye fear heat
Chanyi
Liver depression and stagnation of Qi
Liver kidney yin deficiency eyes faintness
Partial view of moving eyes in liver wind
Ascites due to cirrhosis
Anal pruritus
Perianal abscess
Perianal subcutaneous abscess
Abscess of pelvic rectum fossa
Abscess of posterior anal space
Submucosa abscess of anal canal
Abscess of the levator anal muscle
Abscess of levator ani muscle
Anal papilloma
High anoanopathy
Anal fistula
Anal stricture
Anohypoplasia
Valgus anus
ectopic anus
Imperforate anus
Anorectal distention
Anal fissure
Expired pregnancy
Liver depression and qi stagnation postpartum urination and pain
Liver depression, stagnation of Qi, milk
Milk leakage after liver depression
Milk leakage after liver heat
Liver depression and qi stagnation infertility
Liver stagnation, stagnation of Qi, dirty and impetuous
Liver, gallbladder, damp heat and Yin sore
Deficiency of Yin sore of liver and kidney yin
Deficiency of yin and pain of liver and kidney yin
Liver depression, qi stagnation and Yin pain
Liver meridian damp heat Yin pain
Deficiency of liver and kidney yin and itching
The dampness and heat of liver
Deficiency of liver and kidney yin
Stagnation of liver qi and cold
Liver is wet, hot, cold and cold
Deficiency of liver and kidney yin
Vaginal bleeding after liver depression and ring
Amenorrhea after abortion
Liver qi deficiency, weak fetus
Slow shock of deficiency of liver and kidney yin
Hypothermia of creji
Infantile Spleen Deficiency hand foot heart heat
Precocious liver by damp heat
Stagnation of liver qi and precocity
Over food cold accumulation stagnation
Creji
Frequency of wet and hot urine in liver and gallbladder
The children's convulsion of liver wind phlegm heat
Residual urine of liver meridian
Sores between neck and liver and stomach
Liver depression, blood stasis, neck sores
Liver stagnation phlegm coagulates the sores between neck
Deficiency of liver and kidney yin
Liver depression, blood heat, axillary swelling
Liver depression, stagnation of Qi, breast swelling and pain
Liver qi stagnation and breast mass
Rupture of fire nipple due to liver depression
Liver kidney yin deficiency sores
Anal leakage
Anal leakage through intestine and clearing Yin
Anal pus
Anal fall
Liver qi stagnation knot anal fall again
Swelling of anus
Perianal carbuncle
Perianal sores
Anal hemorrhoids
Wart of anus
Liver depression and blood deficiency; wart in anus
Warts in anus caused by deficiency of liver and kidney yin
Abnormal muscle strength of quadriceps femoris
Abnormal muscle strength of the circumflex muscle group
Abnormal muscle strength of abductor muscle group
Abnormal myostrength of the myometrium of the short adductor and the longus adductor
Abnormal muscle strength of the thinus femoris
Abnormal muscle strength of diaphragm
Myostrength of radial brachii muscle is abnormal
Triceps brachii muscle abnormal
Abnormal muscle strength of biceps and brachial muscles
Abnormal muscle strength of infraspinatus
Abnormal muscle strength of supraspinatus muscle
Abnormal sensory function
Arched foot
[truncated: 8,442 more rows]
